# Supplementary material for: Transcriptome analysis of the bloodstream stage from the parasite Trypanosoma vivax
Source: PubMed Central journal article supplement (PMC4007602; doi:10.1186/1471-2164-14-149), 2013-03-05

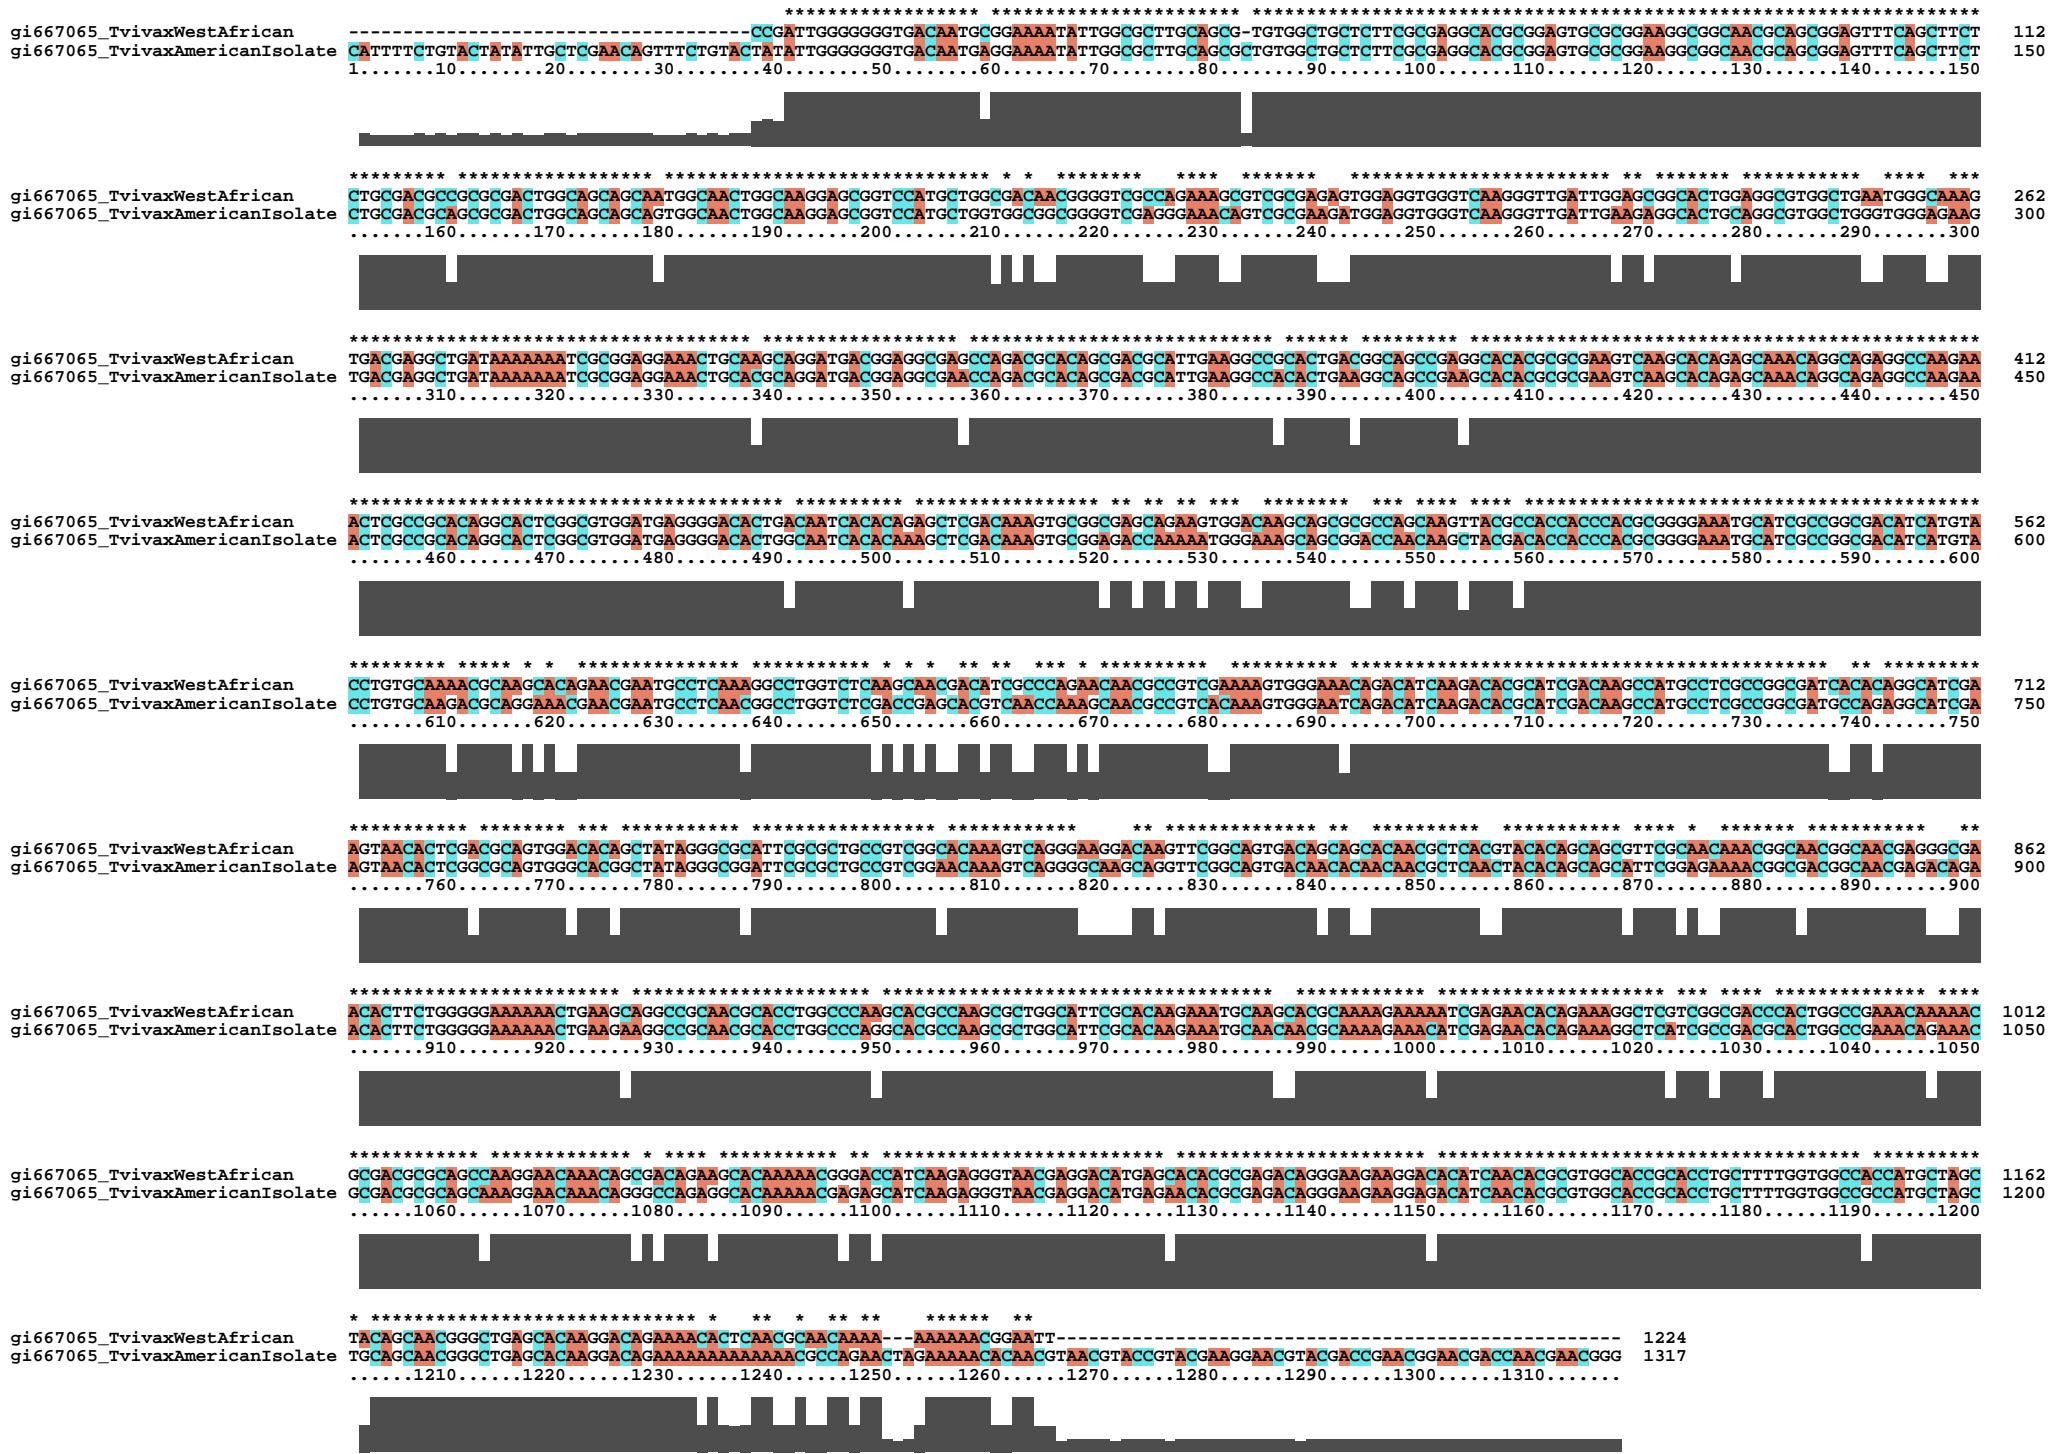

Supplement: 1471-2164-14-149-S6.pdf [file 1471-2164-14-149-S6.pdf]
